# Supplementary material for: Performance of Qualitative and Quantitative Antigen Tests for SARS-CoV-2 Using Saliva
Source: MDPI journal article supplement (doi:10.3390/idr13030069), 2021-08-24
Supplement: s1 [file s1]

Table S1. Raw data in PCR-positive specimens

| Days after<br>symptom onset | specimen | Ct value | Tp value<br>(sec) | CLEIA<br>(pg/mL) | ICA      |
|-----------------------------|----------|----------|-------------------|------------------|----------|
| 2                           | NPS      | 29.56192 | 586               | 40.87            | negative |
| 3                           | NPS      | 12.90119 | 301               | 5000             | positive |
| 4                           | NPS      | 21.74256 | 391               | 685.64           | positive |
| 7                           | NPS      | 18.89330 | 346               | 5000             | positive |
| 7                           | NPS      | 21.52387 | 391               | 487.16           | positive |
| 7                           | NPS      | 25.95481 | 451               | 699.01           | positive |
| 7                           | NPS      | 32.91834 | 661               | 11.62            | negative |
| 8                           | NPS      | 18.88139 | 436               | 2484.37          | positive |
| 9                           | NPS      | 19.76842 | 346               | 5000             | positive |
| 9                           | NPS      | 31.75552 | 646               | 196.65           | positive |
| 10                          | NPS      | 21.75409 | 391               | 422.62           | positive |
| 12                          | NPS      | 31.85005 | 526               | 11.77            | negative |
| 12                          | NPS      | 30.54592 | 601               | 5.34             | negative |
| 12                          | NPS      | 29.77066 | 511               | 15.02            | negative |
| 12                          | NPS      | 28.65936 | 556               | 55.43            | negative |
| 14                          | NPS      | 24.86924 | 406               | 213.09           | positive |
| 14                          | NPS      | 29.59635 | 556               | 10.62            | negative |
| 2                           | saliva   | 19.62641 | 391               | 1357.72          | positive |
| 2                           | saliva   | 21.89011 | 376               | 485.26           | positive |
| 4                           | saliva   | 18.79502 | 511               | 5000             | positive |
| 7                           | saliva   | 28.14606 | 526               | 5.26             | negative |
| 7                           | saliva   | 32.96928 | 751               | 0.19             | negative |
| 7                           | saliva   | 27.62087 | 541               | 1.63             | negative |
| 7                           | saliva   | 28.81459 | 571               | 5.12             | negative |
| 8                           | saliva   | 25.55043 | 436               | 194.68           | negative |
| 9                           | saliva   | 24.40270 | 481               | 102.21           | negative |
| 9                           | saliva   | 29.54057 | 526               | 3.62             | negative |
| 10                          | saliva   | 32.43248 | 496               | 0.47             | negative |
| 12                          | saliva   | 28.90566 | 571               | 1.07             | negative |
| 12                          | saliva   | 27.46050 | 586               | 9.06             | negative |
| 12                          | saliva   | 27.17160 | 616               | 1.98             | negative |
| 12                          | saliva   | 23.80877 | 496               | 164.85           | positive |
| 14                          | saliva   | 33.81876 | 601               | 0.13             | negative |
| 14                          | saliva   | 30.60193 | 601               | 1.12             | negative |

Table S2. Antigen concentration by CLEIA in PCR-negative specimens

| Antigen concentration<br>(pg/mL) | Frequency | Antigen concentration<br>(pg/mL) | Frequency |
|----------------------------------|-----------|----------------------------------|-----------|
| 0.01                             | 122       | 0.19                             | 1         |
| 0.02                             | 18        | 0.20                             | 2         |
| 0.03                             | 19        | 0.21                             | 2         |
| 0.04                             | 16        | 0.22                             | 1         |
| 0.05                             | 14        | 0.23                             | 2         |
| 0.06                             | 12        | 0.24                             | 1         |
| 0.07                             | 6         | 0.25                             | 1         |
| 0.08                             | 19        | 0.27                             | 1         |
| 0.09                             | 11        | 0.28                             | 1         |
| 0.10                             | 14        | 0.30                             | 1         |
| 0.11                             | 5         | 0.34                             | 2         |
| 0.12                             | 3         | 0.37                             | 1         |
| 0.13                             | 6         | 0.39                             | 1         |
| 0.14                             | 7         | 0.40                             | 2         |
| 0.15                             | 3         | 0.60                             | 1         |
| 0.16                             | 6         | 0.63                             | 1         |
| 0.17                             | 4         | 8.45 (4.78)*                     | 1         |
| 0.18                             | 1         | 24.23 (16.07)*                   | 1         |

\* The antigen concentration at re-test was shown in parenthesis.
